# Supplementary material for: Hyperchloremia and Hypernatremia Decreased Microglial and Neuronal Survival during Oxygen–Glucose Deprivation/Reperfusion
Source: MDPI journal article supplement (doi:10.3390/biomedicines12030551), 2024-02-29
Supplement: s1 [file s1]

# Hyperchloremia and Hyponatremia Decreased Microglial and Neuronal Survival during Oxygen–Glucose Deprivation/Reperfusion

Reetika Mahajan <sup>1</sup>, Faheem Shehjar <sup>1</sup>, Adnan I. Qureshi <sup>2</sup> and Zahoor A. Shah <sup>1,\*</sup>

<sup>1</sup> Department of Medicinal and Biological Chemistry, College of Pharmacy and Pharmaceutical Sciences, University of Toledo, Toledo, OH 43614, USA

<sup>2</sup> Zeenat Qureshi Stroke Institutes and Department of Neurology, University of Missouri, Columbia, MO 65211, USA

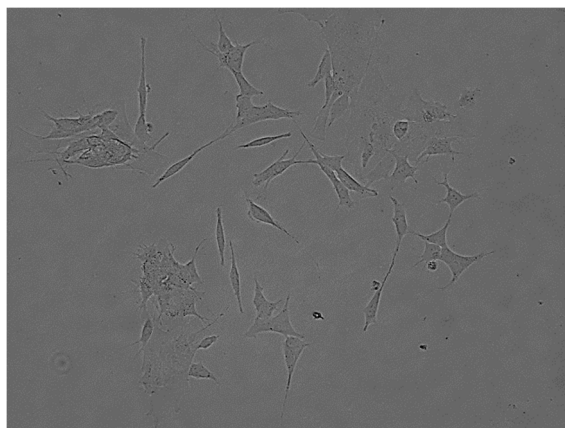

a. Undifferentiated SH-SY5Y cells

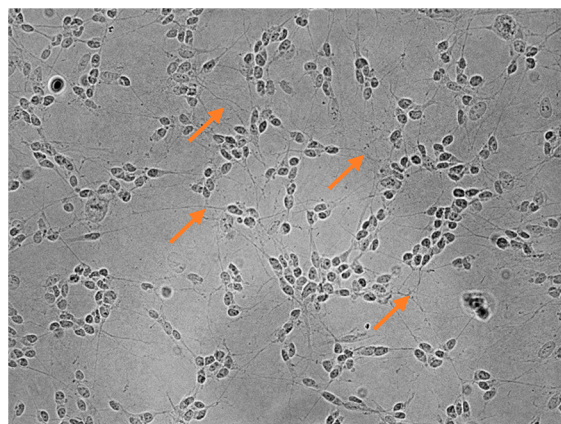

b. Differentiated SH-SY5Y cells (5 days after 10 $\mu$ M Retinoic acid treatment). Orange arrows represent the neurites.

Supplementary Figure S1: Showing the differentiation of SH-SY5Y neuroblastoma into neuron like cells. a. Undifferentiated SH-SY5Y cells b. fully differentiated SH-SY5Y cells (neuron like cells).
